# Supplementary material for: Heterochromatin is refractory to γ-H2AX modification in yeast and mammals
Source: PubMed Central journal article supplement — J Cell Biol. 2007 Jul 16;178(2):209–18. doi: 10.1083/jcb.200612031 (PMC2064441; doi:10.1083/jcb.200612031), 2007-07-16
Supplement: jcellbiol_jcb.200612031_6.pdf [file jcellbiol_jcb.200612031_6.pdf]

# Supplemental Table 1

## Primer pairs for examining $\gamma$ -H2AX in ChIII

| Sense Primers  | Coordinates in ChIII | Sequences                  | Antisense Primers | Coordinates in ChIII | Sequences                 |
|----------------|----------------------|----------------------------|-------------------|----------------------|---------------------------|
| ARS300p1       | 1152 - 1171          | CAAATTGCTTGAACGGATGC       | ARS300p2          | 1440 - 1419          | GGTCATAACCTGTTGACGTAA     |
| YCL073Cp1      | 5455 - 5476          | CTGTACCATGTAAATGAGCGG      | YCL073Cp2         | 5693 - 5676          | TCAGCGTGCCCCAAAAAAA       |
| YCL069Wp1      | 9971 - 9994          | AGGCCGAGAATAAGGGTATACTTC   | YCL069Wp2         | 10121 - 10102        | CAGAGGGCAAACCAAAGAA       |
| HMLp3          | 12426 - 12446        | TCCGCTAATTCTGGAGCGATT      | HMLp4             | 12638 - 12615        | TACTAAACCTTACAGAGGACACCG  |
| HMLp1          | 13388 - 13409        | TGAGGCCAAGCTGCTTCAATAT     | HMLp2             | 13639 - 13617        | CGAGCAGAGAAGACAAGACATTT   |
| HMLp5          | 14026 - 14048        | TTCACTGCTCTTTTCTGTGTTCC    | HMLp6             | 14277 - 14258        | CGATCTTTGGACCATGTTGA      |
| HMLp7          | 14527 - 14549        | GAAATAACGATGCTTATTGTGCT    | HMLp8             | 14741 - 14722        | TTTCGTTTGCCATTTCCAGC      |
| HMLp9          | 15003 - 15022        | GGGGTCTTCATTTGTGTCAA       | HMLp10            | 15233 - 15213        | TTCCGTAATAATCTTCCCAGC     |
| CHA1p1         | 15446 - 15470        | CTGCACTGAGTGTTAGAGGTAGAAA  | CHA1p2            | 15666 - 15643        | CTCGAAGTAAGCATCAACATATCC  |
| HOcsLp1        | ***                  | GACATTGTTGGAGCCGAAAT       | HOcsLp2           | ***                  | GCCGATCTTAGCCAGACGA       |
| AGp1           | ***                  | ATATTTCTCTACAGGGGCGCGG     | MATYAp2           | ***                  | TGTTGCGGAAAGCTGAAACTAAAAG |
| MAT7(2)        | 20513 - 20536        | CCTGGTTTTGGTTTTGTAGAGTGG   | MRC1 p2           | 20770 - 20749        | GCTACCACCATGACCATCATAA    |
| MRC1 p3        | 21521 - 21544        | GTACGTCGTCTTCATCATCATCAC   | MRC1 p4           | 21746 - 21723        | GGATCTGACGACTATGATTCTGAC  |
| KRR1 p1        | 25527 - 25548        | CGCTGAAAGGAAGAGAACAAAG     | KRR1 p2           | 25761 - 25742        | CATTTCGATCTGCTTCAGCA      |
| SPB1p1         | 30534 - 30555        | CTGTACCATCCCATTTGTATCG     | SPB1p2            | 30777 - 30754        | ACTGGACTTCTTGCTTAAACAGC   |
| YCL048Wp1      | 40935 - 40958        | CTGGTGCTTGATCCAAGAATAGC    | YCL048Wp2         | 41138 - 41117        | CATTATCGTCCTGTCAAAGGC     |
| YCL041Cp1      | 50518 - 50539        | CATCGTGAATGGCATCTTCTTC     | YCL041Cp2         | 50750 - 50732        | AGGCGTCGTAATTGAAGGTT      |
| GFD2p1         | 60538 - 60559        | TGGGCAGAGAAAGTAAAAAGAAG    | GFD2p2            | 60781 - 60762        | TACGGATTTTGAGGGATGCT      |
| RRP7p1         | 63893 - 63916        | CTCAAGCTCTTCTCCGATTAAACAC  | RRP7p2            | 64211 - 64192        | ACGCAACTGTTTTAACGCCT      |
| YCL026p1       | 73879 - 83740        | GACGGATTGGATGTCGTTGATA     | YCL026p2          | 74191 - 74172        | CTGTGGCGTTTTACGTGAAA      |
| YCL020p3       | 83749 - 83767        | CCATCGAAAGTGAATCGCA        | YCL020p4          | 84023 - 84003        | CATTTGCCAATAGAACAGTCG     |
| YCL020p1       | 83830 - 83850        | CGTTAAGTCTCAAGCAAAGGG      | YCL020p2          | 84150 - 84127        | CGTCATCTTCTAACACCGTATATG  |
| NFS1p1         | 93556 - 93579        | GGTATCTGGTCTAATGGCATCTTC   | NFS1p2            | 93871 - 93850        | TCACTCTTACGGTTGGGAAACA    |
| GBP2p1         | 98802 - 98824        | GAAGAAGCCTAACAAAGGCAAAG    | GBP2p2            | 99062 - 99041        | GCTCGAAGAGAAGATTTAGCAG    |
| STP22p1        | 103928 - 103949      | ACCATCTGCTACGACTTTGAGT     | STP22p2           | 104167 - 104147      | TGCACCGAATCCTTGACAAT      |
| YCL002p1       | 108667 - 108686      | CCAAAACTCATTTCGTCACCA      | YCL002p2          | 108946 - 108927      | ACATGGGTTACTGGCAGAAA      |
| CEN3p1         | 113609 - 113632      | GGAGCAAATAAGCCAGTTTTAAGG   | MAT7              | ***                  | CTGGTTTTGGTTTTGTAGAGTGG   |
| MATYAp2        | ***                  | TGTTGCGGAAAGCTGAAACTAAAAG  | AGp1              | ***                  | ATATTTCTCTACAGGGGCGCGG    |
| HPH1p1         | ***                  | ATGTTTCGGGGATTCCCAATA      | HPH1p2            | ***                  | ATTATTCCTTTGCCCTCGGA      |
| CDC10p1        | 118757 - 118778      | GGACACGTTTGGAAGGTTAAA      | CDC10p2           | 119095 - 119075      | TATTGCTGGATTGGCGAGAGT     |
| YCR006p1       | 123676 - 123697      | TCCAAGGCAGTTACAGCAATAG     | YCR006p2          | 123997 - 123974      | ATGGTGGTATGAGAGGTATTCCAG  |
| YCR007p1       | 128753 - 128773      | TAAGCATAGCCCCGATACAA       | YCR007p2          | 129023 - 129002      | CACAACTAAGTCATCGAAACGC    |
| ADP1p1         | 133712 - 133734      | CAACATCTTCTCCGCTAACCTAA    | ADP1p2            | 133988 - 133967      | TGGCTGTTTCAGTCGTACACTA    |
| CWH43p1        | 143893 - 143916      | TATGTCTTGGTAAAATGACCCAC    | CWH43p2           | 144112 - 144093      | AAAAGCGACCTTTCTTCGCA      |
| MAT19          | 170939 - 170958      | TCGTCGTCGCCATCATTTTC       | MAT20             | 171133 - 171112      | GCCCAAGTTTGAGAGAGGTTGC    |
| MAT15          | 184137 - 184158      | CGTCTTCTCAGCGAACAACAGC     | MAT16             | 184298 - 184277      | GCAATAACCCACGAAACACTG     |
| MAT13          | 191257 - 191278      | TCAGGGTCTGGTGGAAGGAATG     | MAT14             | 191418 - 191397      | CAAAGGTGGCAGTTGTTGAACC    |
| Fen1p1         | 191257 - 191275      | TCAGGGTCTGGTGGAAGGA        | Fen1p2            | 191600 - 191580      | TGGTGATGGAGATGGAGTAGG     |
| MAT1           | 195491 - 195510      | ATTGCGACAAGGCTTCACCC       | MAT2              | 195665 - 195642      | CACATCACAGGTTTATTGGTTCCC  |
| MAT3           | 197127 - 197148      | ATTCTGCCATTTCAGGGACAGCG    | MAT4              | 197307 - 197286      | CGTGGGAAAAGTAATCCGATGC    |
| MAT3-1         | 199147 - 199170      | ATGTCCTGACTTCTTTTGACGAGG   | MAT4-1            | 199393 - 199372      | ACGACCTATTTGTAACCGCACG    |
| MATYAp1        | 200545 - 200570      | AAAGAAGAAGTTGCAAAGAAATGTGG | MATYAp2           | 200744 - 200720      | TGTTGCGGAAAGCTGAAACTAAAAG |
| MAT7(2)        | 200761 - 200784      | CCTGGTTTTGGTTTTGTAGAGTGG   | MAT8              | 200945 - 200924      | GAGCAAGACGATGGGGAGTTTC    |
| MATZp1B        | 200929 - 200946      | TCCCCATCGTCTTGCTCT         | MATDp1            | 201223 - 201205      | CCGCATGGGCAGTTTACCT       |
| MAT9           | 202658 - 202681      | GCCTCTATGTCCCCATCTTGTCTC   | MAT10             | 202840 - 202819      | GTGTTCCCGATTTCAGTTTGACG   |
| MAT11          | 203645 - 203668      | TAACCAGCAATACCAAGACAGCAC   | MAT12             | 203849 - 203826      | TTTTACCTACCGCACCTTCTAAGC  |
| YCR043Cp2      | 206111 - 206134      | CCAAGGAATAATGATCTAAGCACA   | YCR043Cp2         | 206484 - 206460      | ACCAGCAGTAATAAGTCGTCCTGA  |
| IMG1p2         | 209928 - 209947      | TGGATCATGGACAAGGTCCTAC     | IMG1p2            | 210284 - 210263      | GGCGAAAACAATGGCACTCT      |
| CTR86p1        | 218684 - 218706      | CGGTCCTCGATTTTGTTACCTTC    | CTR86p2           | 218969 - 218947      | GCAAGGATATTCTCGCCTTTTTC   |
| PWP2p1         | 222318 - 222341      | GACACACTTTACTTTGGCTTGTT    | PWP2p2            | 222627 - 222606      | GACTTCCAAAGACTTAAGCGCA    |
| YCR061p1       | 227305 - 227326      | GGAAAGACTGGCTCATCAAAAC     | YCR061p2          | 227631 - 227610      | ACATTCTCAGAGAGAACCTCCA    |
| RAD18p1        | 232255 - 232274      | TGTCATCGTTGGGACTGTCA       | RAD18p2           | 232560 -232537       | GAAACATAACCATCCATCCTTTCC  |
| ERS1p1         | 248132 - 248151      | ACACCCTGAATGGGGAAAC        | ERS1p2            | 248451 - 248434      | CTGCATGGGTGCTTGATG        |
| MAT48 F        | 259071 - 259095      | GTTGATGTATTGGCGGAGAAATAGG  | MAT48 R           | 259373 - 259352      | TTTTGGGTCACTATATCTAGGGCG  |
| MAT53 F        | 269688 - 269708      | AACAACGGTGAACGGTGCTG       | MAT53 R           | 270059 - 270038      | GCAGTAGAAACCTGGGATGTGG    |
| MAT fdistal p1 | 279718 - 279737      | TTTCCAACCGCAACTTCTTG       | MAT fdistal p2    | 279905 - 279885      | GCTGGAACAATGGTGATAGGT     |
| MAT fdistal p3 | 289800 - 289820      | AGCCACATCTCAATAAAGGCA      | MAT fdistal p4    | 289954 - 289934      | TCCAAGGCATAATGTGTGAAG     |

## Primer pairs for examining $\gamma$ -H2AX in ChVI

| Sense Primers | Coordinates in ChIII | Sequences                 | Antisense Primers | Coordinates in ChIII | Sequences                 |
|---------------|----------------------|---------------------------|-------------------|----------------------|---------------------------|
| RGD2p1        | 41054 - 41075        | CTGTACTGACCAAGCTTCCTA     | RGD2p2            | 41353 - 41336        | TTCACCAGTGGTAGGCTC        |
| FET5p1        | 50939 - 50959        | GATGAGAAGGTGTACCACACG     | FET5p2            | 51221 - 51204        | GAGCGTCACAACGTCAGA        |
| RPO41p1       | 61021 - 61043        | TTGGAATAAAGGTGAAGGTTTCC   | RPO41p2           | 61320 - 61297        | CCACGACTCATATCATTACCAAGA  |
| RIM18p1       | 70853 - 70872        | TTCTGCATGGAATGGAGGAT      | RIM18p2           | 71106 - 71086        | CTTCAGATGCTATCGCAGCTA     |
| GYP8p1        | 80856 - 80874        | CTGGCAGTAGTCGCATCTT       | GYP8p2            | 81140 - 81119        | ACCTATAGATAGCGGTGACAAC    |
| BST1p1        | 85929 - 85950        | TCTAGGACATCGTTTCATTTCCA   | BST1p2            | 86296 - 86274        | TTGGATACTACTTTACCTGCAGA   |
| GAT1p1        | 96882 - 96905        | GATATAAAATGCTCCAACCTGCACA | GAT1p2            | 97178 - 97159        | AGGTGCGACAATGTTCAGTG      |
| CH6CSp1       | ***                  | TCCATACATTTTGATGGCCG      | CH6CSp2           | ***                  | AGGCTTTTTACCCATGGTTG      |
| LPD1p1        | 102956 - 102979      | GACTTAATGGTAGCAAACGTAGTG  | LPD1p2            | 103235 - 103216      | CACACGCCCCGAATTATTGTT     |
| HSP12p1       | 107915 - 107935      | GCTTCGTTGTTTCTGATTGCAG    | HSP12p2           | 108216 - 108197      | AGCGCGAAATAACGTTCTGA      |
| CDC4p1        | 117926 - 117945      | ATTCAACTTGTTGCGGTTTCG     | CDC4p2            | 118159 - 118136      | TCTTCTGTCTCAACTGTCTTAGCC  |
| BLM3p1        | 127914 - 127936      | TCAGAGATTCAACAGAGGGATGT   | BLM3p2            | 128211 - 128190      | CAAATCTTCGAGGATCGAACTG    |
| YFLWp1        | 137908 - 137929      | GGTCAGGTTTTATTGCAGAATG    | YFLWp2            | 138198 - 138174      | CCGTCAGAGGTTTAGAACTTGTAGA |
| YFR006p1      | 152917 - 152939      | GCAAGTTCTAGTGGAGAATAAGG   | YFR006p2          | 153221 - 153204      | GATCATTCTCCGCGTCCTT       |

## Primer pair for the control location, *CEN8*

| Primers | Sequences               |
|---------|-------------------------|
| CEN8 p1 | TGACAAAACCTCTCCCTTAGTGC |
| CEN8 p2 | CTCCAACAATTACACATCCACA  |

Primers denoted as \*\*\* are specific to the HO cassettee.
